# Supplementary material
Source: publisher figshare collection journal article supplement (https://gsajournals.figshare.com/ndownloader/files/21214494)
Supplement: Supplementary file 1 [file 21214494]

## Sheet: Sheet1
Supplmentary Table 4: BUSCO analysis of the A_gly_v1 and A_gly_v2 gene sets using the Arthropoda gene set (n=1,066).
BUSCO category	Gene set
	A_gly_v1 OGS*	A_gly_v2
Complete	985	1016
Complete and single-copy	862	967
Complete and duplicated	123	49
Fragmented	15	15
Missing	66	35
*OGS = official gene set
